# Supplementary material
Source: publisher figshare collection journal article supplement (https://tandf.figshare.com/ndownloader/files/14810321)
Supplement: Supplementary file 1 [file 14810321]

Supplemental Table 1. Demographic and Descriptive Information by Experimental Condition

|  | **Low FC** | **Mod FC** | **High FC** |
| --- | --- | --- | --- |
| **Low DC** | *Sex*  Male = 11  Female = 33  *Race*  AI/NA = 0  A/AA = 1  B/AA = 2  W = 35  O/M = 5  *Ethnicity*  H = 9  NH = 35  *Class*  Fre = 8  Sop = 5  Jun = 13  Sen = 18  *Age* = 20.55 (1.28)  *TWS* = 48 (23.94)  *TTC* = 965 (455.61) | *Sex*  Male = 11  Female = 33  *Race*  AI/NA = 0  A/AA = 3  B/AA = 2  W = 35  O/M = 3  *Ethnicity*  H = 9  NH = 35  *Class*  Fre = 5  Sop = 9  Jun = 15  Sen = 15  *Age* = 20.73 (1.66)  *TWS* = 42 (15.76)  *TTC* = 857 (410.31) | *Sex*  Male = 13  Female = 31  *Race*  AI/NA = 0  A/AA = 1  B/AA = 2  W = 37  O/M = 4  *Ethnicity*  H = 4  NH = 39  *Class*  Fre = 3  Sop = 6  Jun = 18  Sen = 17  *Age* = 20.89 (1.43)  *TWS* = 52 (38.59)  *TTC* = 981 (397.06) |
| **High DC** | *Sex*  Male = 15  Female = 33  *Race*  AI/NA = 1  A/AA = 1  B/AA = 3  W = 38  O/M = 5  *Ethnicity*  H = 9  NH = 39  *Class*  Fre = 6  Sop = 9  Jun = 16  Sen = 16  *Age* = 21.02 (1.84)  *TWS* = 41 (11.48)  *TTC* = 1005 (455.71) | *Sex*  Male = 8  Female = 42  *Race*  AI/NA = 1  A/AA = 0  B/AA = 2  W = 42  O/M = 5  *Ethnicity*  H = 9  NH = 40  *Class*  Fre = 7  Sop = 11  Jun = 16  Sen = 16  *Age* = 20.54 (2.34)  *TWS* = 43 (16.53)  *TTC* = 889 (409.12) | *Sex*  Male = 8  Female = 39  *Race*  AI/NA = 2  A/AA = 1  B/AA = 2  W = 39  O/M = 3  *Ethnicity*  H = 5  NH = 41  *Class*  Fre = 3  Sop = 6  Jun = 15  Sen = 23  *Age* = 21.17 (1.85)  *TWS* = 54 (65.42)  *TTC* = 942 (394.29) |

*Notes*: Each cell includes counts and means for demographics and variables. If counts across cells do not add up to the study sample (*N* = 277), that indicates participants elected not to provide information. Counts are provided for sex, race, and ethnicity; the mean is provided for age. For all presented means, standard deviations are presented in parentheses. Abbreviations: AI/NA = American Indian or Native American; A/AA = Asian or Asian American; B/AA = Black or African-American; W = White; O/M = Other/Multiple; H = Hispanic; NH = Non-Hispanic; Fre = Freshman; Sop = Sophomore; Jun = Junior; Sen = Senior; TWS = Time with Stimuli (seconds); TTC = Time to Complete Study (seconds).
